# Supplementary material
Source: publisher figshare collection journal article supplement (https://frontiersin.figshare.com/ndownloader/files/14893631)
Supplement: Supplementary file 1 [file 14893631]

## Sheet: Supplementary_Table_1_revised
Table S1	List of 781 Lineage 2 strains used in this study with the associated metadata
ORIGINAL_NAME	SUBLINEAGE	ACCESSION_NUMBER	GEOGRAPHY_PATIENT_BIRTH	MIGRATION_EVENT	ISOLATION_YEAR	REFERENCE
SAMEA1877086	Other	ERR234098	Eastern-Asia	NA	NA	Comas et al., 2013
SAMEA1877146	Asian-African2	ERR234100	Eastern-Asia	NA	NA	Comas et al., 2013
SAMEA1877161	Asian-African2	ERR234102	Eastern-Asia	NA	NA	Comas et al., 2013
SAMEA1877151	Other	ERR234103	Eastern-Asia	NA	NA	Comas et al., 2013
SAMEA1877212	Other	ERR234105	Eastern-Asia	NA	NA	Comas et al., 2013
SAMEA2609926	Pacific-RD150	ERR538422	Eastern-Asia	NA	NA	Kato-Maeda et al., 2012
SAMEA2609927	Other	ERR538423	Eastern-Asia	NA	NA	Kato-Maeda et al., 2012
SAMEA2609928	Pacific-RD150	ERR538424	Eastern-Asia	NA	NA	Kato-Maeda et al., 2012
SAMEA2609929	Asian-African3	ERR538425	Eastern-Asia	NA	NA	Kato-Maeda et al., 2012
SAMEA2609930	Other	ERR538426	Eastern-Asia	NA	NA	Kato-Maeda et al., 2012
SAMEA2609931	Asian-African2/RD142	ERR538427	Eastern-Asia	NA	NA	Kato-Maeda et al., 2012
SAMEA2609932	Asia-Ancestral1(RD181+)	ERR538428	Eastern-Asia	NA	NA	Kato-Maeda et al., 2012
SAMEA2609933	Asian-African2/RD142	ERR538429	Northern-America	NA	NA	Kato-Maeda et al., 2012
SAMEA2609934	Asian-African2/RD142	ERR538430	Eastern-Asia	NA	NA	Kato-Maeda et al., 2012
SAMEA2609935	Asia-Ancestral1(RD181+)	ERR538431	Eastern-Asia	NA	NA	Kato-Maeda et al., 2012
SAMEA2609936	Proto-beijing	ERR538432	Eastern-Asia	NA	NA	Kato-Maeda et al., 2012
SAMEA1877180	Other	ERR234107	Eastern-Asia	NA	NA	Comas et al., 2013
SAMEA1877201	Other	ERR234108	Eastern-Asia	NA	NA	Comas et al., 2013
SAMEA1877264	Asian-African1	ERR234110	Eastern-Asia	NA	NA	Comas et al., 2013
SAMEA1877119	Other	ERR234112	Eastern-Asia	NA	NA	Comas et al., 2013
SAMEA1877113	Other	ERR234129	Eastern-Asia	NA	NA	Comas et al., 2013
SAMEA1877072	Other	ERR234115	Eastern-Asia	NA	NA	Comas et al., 2013
SAMEA1877090	Other	ERR234114	Eastern-Asia	NA	NA	Comas et al., 2013
SAMEA1877080	Other	ERR234116	Eastern-Asia	NA	NA	Comas et al., 2013
SAMEA1877170	Other	ERR234117	Eastern-Asia	NA	NA	Comas et al., 2013
SAMEA1877156	Other	ERR234118	Eastern-Asia	NA	NA	Comas et al., 2013
SAMEA1877224	Other	ERR234119	Eastern-Asia	NA	NA	Comas et al., 2013
SAMEA1877213	Other	ERR234120	Eastern-Asia	NA	NA	Comas et al., 2013
SAMEA1877226	Pacific-RD150	ERR234121	Eastern-Asia	NA	NA	Comas et al., 2013
SAMEA1877179	Other	ERR234122	Eastern-Asia	NA	NA	Comas et al., 2013
SAMEA1877199	Other	ERR234123	Eastern-Asia	NA	NA	Comas et al., 2013
SAMEA1877284	Other	ERR234124	Eastern-Asia	NA	NA	Comas et al., 2013
SAMEA1877294	Other	ERR234125	Eastern-Asia	NA	NA	Comas et al., 2013
SAMEA1877250	Other	ERR234126	Eastern-Asia	NA	NA	Comas et al., 2013
SAMEA1877246	Other	ERR234127	Eastern-Asia	NA	NA	Comas et al., 2013
SAMEA1877257	Asia-Ancestral2	ERR234128	Eastern-Asia	NA	NA	Comas et al., 2013
SAMEA1877099	Pacific-RD150	ERR234130	Eastern-Asia	NA	NA	Comas et al., 2013
SAMEA1877107	Other	ERR234131	Eastern-Asia	NA	NA	Comas et al., 2013
SAMEA1877144	Other	ERR234132	Eastern-Asia	NA	NA	Comas et al., 2013
SAMEA1877130	Asia-Ancestral2	ERR234133	Eastern-Asia	NA	NA	Comas et al., 2013
SAMEA1877174	Asian-African2	ERR234134	Eastern-Asia	NA	NA	Comas et al., 2013
SAMEA1877149	Other	ERR234135	Eastern-Asia	NA	NA	Comas et al., 2013
SAMEA1877185	Other	ERR234136	Eastern-Asia	NA	NA	Comas et al., 2013
SAMEA1877202	Other	ERR234137	Eastern-Asia	NA	NA	Comas et al., 2013
SAMEA1877198	Asia-Ancestral2	ERR234138	Eastern-Asia	NA	NA	Comas et al., 2013
SAMEA1877230	Other	ERR234139	Eastern-Asia	NA	NA	Comas et al., 2013
SAMEA1877215	Pacific-RD150	ERR234140	Eastern-Asia	NA	NA	Comas et al., 2013
SAMEA1877193	Other	ERR234141	Eastern-Asia	NA	NA	Comas et al., 2013
SAMEA838000	Europe/Russia/B0/W148	ERR015614	Eastern-Europe	NA	NA	Comas et al., 2013
SAMEA838034	Central-Asia	ERR015616	Eastern-Europe	NA	NA	Comas et al., 2013
SAMN00103232	Other	SRR022870	Eastern-Asia	NA	NA	Comas et al., 2010
SAMN00103234	Asia-Ancestral1(RD181+)	SRR022872	Eastern-Asia	NA	NA	Comas et al., 2010
SAMN00102923	Other	SRR014814	Eastern-Asia	NA	NA	Comas et al., 2010
SAMEA1877239	Asian-African3	ERR233357	Southeastern-Asia	NA	NA	Comas et al., 2013
SAMEA1877271	Asia-Ancestral1(RD181+)	ERR233359	Eastern-Asia	NA	NA	Comas et al., 2013
SAMEA1877287	Pacific-RD150	ERR233361	Southeastern-Asia	NA	NA	Comas et al., 2013
SAMEA1877168	Asian-African3	ERR233370	Southeastern-Asia	NA	NA	Comas et al., 2013
SAMEA1877068	Other	ERR233375	Southern-Asia	NA	NA	Comas et al., 2013
SAMEA1877137	Asian-African2	ERR233386	Southern-Asia	NA	NA	Comas et al., 2013
SAMEA1877172	Other	ERR233388	Southern-Asia	NA	NA	Comas et al., 2013
SAMEA2294189	Pacific-RD150	ERR392512	Eastern-Asia	NA	NA	Portevin et al., 2014
SAMEA3318364	Other	ERR841423	Southern-Asia	NA	NA	Kato-Maeda et al., 2012
SAMEA3318365	Other	ERR841424	Southern-Asia	NA	NA	Kato-Maeda et al., 2012
SAMEA3318367	Other	ERR841427	Southern-Asia	NA	NA	Kato-Maeda et al., 2012
SAMEA3318376	Central-Asia	ERR841392	Western-Asia	NA	2007	Kato-Maeda et al., 2012
SAMEA2294190	Pacific-RD150	ERR392513	Southeastern-Asia	NA	NA	Portevin et al., 2014
SAMEA3318421	Pacific-RD150	ERR841446	Southern-Africa	M8	NA	Kato-Maeda et al., 2012
SAMEA3318422	Pacific-RD150	ERR841447	Southern-Africa	M8	NA	Kato-Maeda et al., 2012
SAMEA3318423	Pacific-RD150	ERR841448	Southern-Africa	M8	NA	Kato-Maeda et al., 2012
SAMEA3318425	Pacific-RD150	ERR841450	Southern-Africa	M8	NA	Kato-Maeda et al., 2012
SAMEA3318426	Pacific-RD150	ERR841451	Southern-Africa	M8	NA	Kato-Maeda et al., 2012
SAMEA3318427	Pacific-RD150	ERR841452	Southern-Africa	M8	NA	Kato-Maeda et al., 2012
SAMEA3318428	Pacific-RD150	ERR841453	Southern-Africa	M8	NA	Kato-Maeda et al., 2012
SAMEA3318429	Pacific-RD150	ERR841454	Southern-Africa	M8	NA	Kato-Maeda et al., 2012
SAMEA3318430	Pacific-RD150	ERR841455	Southern-Africa	M8	NA	Kato-Maeda et al., 2012
SAMEA3318431	Pacific-RD150	ERR841456	Southern-Africa	M8	NA	Kato-Maeda et al., 2012
SAMEA3318432	Pacific-RD150	ERR841457	Southern-Africa	M8	NA	Kato-Maeda et al., 2012
SAMEA3318439	Other	ERR841464	Southern-Africa	M13	NA	Kato-Maeda et al., 2012
SAMEA3318440	Pacific-RD150	ERR841465	Southern-Africa	M8	NA	Kato-Maeda et al., 2012
N0031	Proto-beijing	NA	Eastern-Asia	NA	NA	This study
SAMEA1877114	Other	ERR234208	Southeastern-Asia	NA	NA	Comas et al., 2013
SAMEA1877286	Asian-African3	ERR234193	Southeastern-Asia	NA	NA	Comas et al., 2013
SAMEA1877267	Pacific-RD150	ERR234190	Southeastern-Asia	NA	NA	Comas et al., 2013
SAMEA1877242	Pacific-RD150	ERR234242	Southeastern-Asia	NA	NA	Comas et al., 2013
SAMEA1877289	Other	ERR234209	Southeastern-Asia	NA	NA	Comas et al., 2013
SAMEA1877261	Asia-Ancestral1(RD181+)	ERR234211	Southeastern-Asia	NA	NA	Comas et al., 2013
SAMEA1877275	Other	ERR234245	Southeastern-Asia	NA	NA	Comas et al., 2013
SAMEA1877290	Pacific-RD150	ERR234246	Southeastern-Asia	NA	NA	Comas et al., 2013
SAMEA1877248	Other	ERR234247	Southeastern-Asia	NA	NA	Comas et al., 2013
SAMEA1877240	Asian-African2/RD142	ERR234213	Southeastern-Asia	NA	NA	Comas et al., 2013
SAMEA1877211	Asian-African2	ERR234215	Eastern-Asia	NA	NA	Comas et al., 2013
SAMEA1877251	Proto-beijing	ERR234248	Eastern-Asia	NA	NA	Comas et al., 2013
SAMEA1877195	Proto-beijing	ERR234216	Southeastern-Asia	NA	NA	Comas et al., 2013
SAMEA1877129	Pacific-RD150	ERR234249	Southeastern-Asia	NA	NA	Comas et al., 2013
SAMEA1877140	Asian-African3	ERR234250	Southeastern-Asia	NA	NA	Comas et al., 2013
SAMEA1877218	Proto-beijing	ERR234252	Eastern-Asia	NA	NA	Comas et al., 2013
SAMEA1877205	Asian-African2	ERR234253	Eastern-Asia	NA	NA	Comas et al., 2013
SAMEA1877288	Pacific-RD150	ERR234256	Eastern-Asia	NA	NA	Comas et al., 2013
SAMEA1877078	Asian-African2/RD142	ERR234263	Southeastern-Asia	NA	NA	Comas et al., 2013
SAMEA1877263	Asian-African2	ERR234269	Eastern-Asia	NA	NA	Comas et al., 2013
SAMEA1877268	Other	ERR234270	Eastern-Asia	NA	NA	Comas et al., 2013
SAMEA1877219	Other	ERR234271	Eastern-Asia	NA	NA	Comas et al., 2013
N0030	Pacific-RD150	PRJEB5148	Unknown	NA	NA	Portevin et al., 2014
N0147	Pacific-RD150	PRJEB5148	Unknown	NA	NA	Portevin et al., 2014
N1439	Pacific-RD150	NA	Oceania	NA	NA	This study
D1448	Pacific-RD150	NA	Oceania	NA	NA	This study
D1443	Pacific-RD150	NA	Oceania	NA	NA	This study
D1445	Asia-Ancestral1(RD181+)	NA	Oceania	NA	NA	This study
D1482	Pacific-RD150	NA	Oceania	NA	NA	This study
D1480	Pacific-RD150	NA	Oceania	NA	NA	This study
D1478	Pacific-RD150	NA	Oceania	NA	NA	This study
D1450b	Pacific-RD150	NA	Oceania	NA	NA	This study
SAMEA4441446	Asia-Ancestral1(RD181+)	ERR1633796	Southern-Africa	M1	2010	Koch et al., 2017
SAMEA4441479	Pacific-RD150	ERR1633829	Southern-Africa	M8	2009	Koch et al., 2017
SAMEA4441427	Pacific-RD150	ERR1633777	Southern-Africa	M8	2009	Koch et al., 2017
SAMEA4441441	Asia-Ancestral1(RD181+)	ERR1633791	Southern-Africa	M1	2010	Koch et al., 2017
SAMEA4441447	Other	ERR1633797	Southern-Africa	NA	2009	Koch et al., 2017
SAMEA4441450	Pacific-RD150	ERR1633800	Southern-Africa	M8	2010	Koch et al., 2017
SAMEA4441466	Asian-African2	ERR1633816	Southern-Africa	M11	2009	Koch et al., 2017
SAMEA4441469	Pacific-RD150	ERR1633819	Southern-Africa	M8	2009	Koch et al., 2017
SAMEA4441472	Other	ERR1633822	Southern-Africa	M13	2008	Koch et al., 2017
SAMEA4441473	Pacific-RD150	ERR1633823	Southern-Africa	M8	2009	Koch et al., 2017
SAMEA4441474	Pacific-RD150	ERR1633824	Southern-Africa	M8	2009	Koch et al., 2017
SAMEA4441478	Pacific-RD150	ERR1633828	Southern-Africa	M8	2010	Koch et al., 2017
SAMEA4441481	Asian-African2	ERR1633831	Southern-Africa	M11	2009	Koch et al., 2017
SAMEA4441485	Pacific-RD150	ERR1633835	Southern-Africa	M8	2008	Koch et al., 2017
SAMEA4441493	Other	ERR1633843	Southern-Africa	NA	2008	Koch et al., 2017
SAMEA4441494	Pacific-RD150	ERR1633844	Southern-Africa	M8	2010	Koch et al., 2017
SAMEA4441514	Pacific-RD150	ERR1633864	Southern-Africa	M8	2010	Koch et al., 2017
SAMEA4441518	Asia-Ancestral3	ERR1633868	Southern-Africa	NA	2009	Koch et al., 2017
SAMEA4441519	Asia-Ancestral1(RD181+)	ERR1633869	Southern-Africa	M1	2009	Koch et al., 2017
SAMEA4441531	Other	ERR1633881	Southern-Africa	M12	2010	Koch et al., 2017
SAMEA4441596	Pacific-RD150	ERR1633946	Southern-Africa	M8	2010	Koch et al., 2017
SAMEA4441614	Other	ERR1633964	Southern-Africa	M12	2010	Koch et al., 2017
SAMEA4441522	Asian-African2	ERR1633872	Southern-Africa	M11	2008	Koch et al., 2017
SAMEA4441532	Pacific-RD150	ERR1633882	Southern-Africa	M8	2010	Koch et al., 2017
SAMEA4441535	Pacific-RD150	ERR1633885	Southern-Africa	M8	2010	Koch et al., 2017
SAMEA4441545	Asian-African2	ERR1633895	Southern-Africa	NA	2008	Koch et al., 2017
SAMEA4441546	Other	ERR1633896	Southern-Africa	M7	2009	Koch et al., 2017
SAMEA4441565	Pacific-RD150	ERR1633915	Southern-Africa	M8	2010	Koch et al., 2017
SAMEA4441572	Pacific-RD150	ERR1633922	Southern-Africa	M8	2010	Koch et al., 2017
SAMEA4441575	Asian-African2	ERR1633925	Southern-Africa	M11	2010	Koch et al., 2017
SAMEA4441578	Other	ERR1633928	Southern-Africa	M7	2009	Koch et al., 2017
SAMEA4441582	Asia-Ancestral1(RD181+)	ERR1633932	Southern-Africa	M1	2010	Koch et al., 2017
SAMEA4441583	Pacific-RD150	ERR1633933	Southern-Africa	M8	2010	Koch et al., 2017
SAMEA4441588	Other	ERR1633938	Southern-Africa	NA	2008	Koch et al., 2017
SAMEA4441589	Pacific-RD150	ERR1633939	Southern-Africa	M8	2010	Koch et al., 2017
SAMEA4441594	Other	ERR1633944	Southern-Africa	M12	2010	Koch et al., 2017
SAMEA4441598	Pacific-RD150	ERR1633948	Southern-Africa	M8	2010	Koch et al., 2017
SAMEA4441601	Asian-African2	ERR1633951	Southern-Africa	M9	2009	Koch et al., 2017
SAMEA4441605	Other	ERR1633955	Southern-Africa	M7	2008	Koch et al., 2017
SAMEA4441606	Other	ERR1633956	Southern-Africa	M12	2010	Koch et al., 2017
SAMEA4441610	Pacific-RD150	ERR1633960	Southern-Africa	M8	2010	Koch et al., 2017
SAMEA4441611	Other	ERR1633961	Southern-Africa	M7	2008	Koch et al., 2017
SAMEA4441612	Pacific-RD150	ERR1633962	Southern-Africa	M8	2010	Koch et al., 2017
D1722	Asian-African1	NA	Eastern-Africa	M5	NA	This study
D1735	Asian-African1	NA	Eastern-Africa	M5	NA	This study
D1736	Asian-African1	NA	Eastern-Africa	M5	NA	This study
D1745	Asian-African1	NA	Eastern-Africa	M5	NA	This study
D1746	Asian-African1	NA	Eastern-Africa	M5	NA	This study
D1747	Asian-African1	NA	Eastern-Africa	M5	NA	This study
D1748	Asian-African1	NA	Eastern-Africa	M5	NA	This study
D1749	Asian-African1	NA	Eastern-Africa	M5	NA	This study
D1750	Asian-African1	NA	Eastern-Africa	M5	NA	This study
D1752	Asian-African1	NA	Eastern-Africa	M5	NA	This study
D1758	Asian-African1	NA	Eastern-Africa	M5	NA	This study
D1764	Asian-African1	NA	Eastern-Africa	M5	NA	This study
D1765	Asian-African1	NA	Eastern-Africa	M5	NA	This study
D1766	Asian-African1	NA	Eastern-Africa	M5	NA	This study
D1767	Asian-African1	NA	Eastern-Africa	M5	NA	This study
D1768	Asian-African1	NA	Eastern-Africa	M5	NA	This study
20091025	Pacific-RD150	NA	Southern-Asia	NA	2003	This study
20091085	Other	NA	Eastern-Asia	NA	2001	This study
20091105	Asian-African2	NA	Southern-Africa	M9	2003	This study
20091112	Proto-beijing	NA	Southeastern-Asia	NA	2005	This study
20091114	Asian-African1	NA	Eastern-Africa	M5	2005	This study
20091124	Central-Asia	NA	Western-Europe	NA	2007	This study
20091129	Asian-African2/RD142	NA	Western-Europe	NA	2004	This study
20091131	Other	NA	Western-Europe	NA	2007	This study
20091154	Asian-African2	NA	Western-Asia	NA	2008	This study
20091159	Asia-Ancestral3	NA	Southern-America	NA	2005	This study
20091167	Other	NA	Eastern-Asia	NA	2006	This study
SAMEA3715654	Asian-African2	ERR1367637	Eastern-Asia	NA	2006	This study
20091212	Other	NA	Eastern-Asia	NA	2008	This study
20091213	Asian-African2	NA	Southeastern-Asia	NA	2005	This study
20091324	Asian-African2	NA	Southeastern-Asia	NA	2005	This study
20091326	Asia-Ancestral3	NA	Southeastern-Asia	NA	2006	This study
20091347	Asian-African2	NA	Southeastern-Asia	NA	2003	This study
20091421	Asian-African2	NA	Western-Asia	NA	2008	This study
20091464	Asian-African1	NA	Western-Europe	NA	2007	This study
20091180	Asia-Ancestral3	NA	Southeastern-Asia	NA	2004	This study
20091193	Other	NA	Eastern-Asia	NA	2004	This study
20091206	Asia-Ancestral3	NA	Southeastern-Asia	NA	2005	This study
12-006760	Asia-Ancestral2	NA	Western-Asia	NA	NA	This study
12-005578	Asia-Ancestral3	NA	Western-Asia	NA	NA	This study
12-010749	Europe/Russia/B0/W148	NA	Western-Asia	NA	NA	This study
12-010817	Europe/Russia/B0/W148	NA	Western-Asia	NA	NA	This study
D0058_1	Asia-Ancestral2	NA	Southeastern-Asia	NA	NA	This study
12-016394	Central-Asia	NA	Western-Asia	NA	NA	This study
D0009_1	Pacific-RD150	NA	Southeastern-Asia	NA	NA	This study
D0013_2	Asian-African3	NA	Southeastern-Asia	NA	NA	This study
D0019_2	Asia-Ancestral3	NA	Eastern-Asia	NA	NA	This study
D0023_1	Proto-beijing	NA	Southeastern-Asia	NA	NA	This study
D0025_1	Asian-African2	NA	Southeastern-Asia	NA	NA	This study
D0027_1	Pacific-RD150	NA	Southeastern-Asia	NA	NA	This study
13-003218	Pacific-RD150	NA	Western-Asia	NA	NA	This study
N0015_1	Pacific-RD150	NA	Eastern-Asia	NA	NA	This study
D0035_1	Pacific-RD150	NA	Southeastern-Asia	NA	NA	This study
D0036_1	Asian-African2/RD142	NA	Eastern-Asia	NA	NA	This study
N0038_1	Asia-Ancestral1(RD181+)	NA	Eastern-Asia	NA	NA	This study
D0040_1	Proto-beijing	NA	Southeastern-Asia	NA	NA	This study
D0047_1	Asia-Ancestral1(RD181+)	NA	Northern-America	NA	NA	This study
D0049_1	Asian-African2/RD142	NA	Eastern-Asia	NA	NA	This study
N0118_1	Pacific-RD150	NA	Southeastern-Asia	NA	NA	This study
N0119_1	Other	NA	Eastern-Asia	NA	NA	This study
D0123_1	Other	NA	Eastern-Asia	NA	NA	This study
N0156_1	Other	NA	Southeastern-Asia	NA	NA	This study
N0159_1	Asian-African2	NA	Eastern-Asia	NA	NA	This study
N0160_1	Pacific-RD150	NA	Eastern-Asia	NA	NA	This study
N0167_4	Asian-African2	NA	Unknown	NA	NA	This study
N0192_1	Other	NA	Eastern-Asia	NA	NA	This study
D1872	Other	NA	Eastern-Asia	NA	NA	This study
D1874	Other	NA	Southeastern-Asia	NA	NA	This study
D1882	Pacific-RD150	NA	Eastern-Asia	NA	NA	This study
D2540_1	Asia-Ancestral3	NA	Eastern-Africa	M2	2014	This study
SAMN03257615	Proto-beijing	SRR1710057	Eastern-Asia	NA	NA	Luo et al., 2015
SAMN03263090	Proto-beijing	SRR1710058	Eastern-Asia	NA	NA	Luo et al., 2015
SAMN03263091	Proto-beijing	SRR1710059	Eastern-Asia	NA	NA	Luo et al., 2015
SAMN03263092	Proto-beijing	SRR1710060	Eastern-Asia	NA	NA	Luo et al., 2015
SAMN03263093	Proto-beijing	SRR1710061	Eastern-Asia	NA	NA	Luo et al., 2015
SAMN03263094	Proto-beijing	SRR1710062	Eastern-Asia	NA	NA	Luo et al., 2015
SAMN03263095	Proto-beijing	SRR1710063	Eastern-Asia	NA	NA	Luo et al., 2015
SAMN03263096	Proto-beijing	SRR1710064	Eastern-Asia	NA	NA	Luo et al., 2015
SAMN03263097	Proto-beijing	SRR1710065	Eastern-Asia	NA	NA	Luo et al., 2015
SAMN03263098	Proto-beijing	SRR1710066	Eastern-Asia	NA	NA	Luo et al., 2015
SAMN03263099	Proto-beijing	SRR1710067	Eastern-Asia	NA	NA	Luo et al., 2015
SAMN03263100	Proto-beijing	SRR1710068	Eastern-Asia	NA	NA	Luo et al., 2015
SAMN03263101	Proto-beijing	SRR1710069	Eastern-Asia	NA	NA	Luo et al., 2015
SAMN03263102	Proto-beijing	SRR1710070	Eastern-Asia	NA	NA	Luo et al., 2015
SAMN03263103	Proto-beijing	SRR1710071	Eastern-Asia	NA	NA	Luo et al., 2015
SAMN03263104	Proto-beijing	SRR1710072	Eastern-Asia	NA	NA	Luo et al., 2015
SAMN03263105	Asia-Ancestral3	SRR1710073	Eastern-Asia	NA	NA	Luo et al., 2015
SAMN03263106	Asia-Ancestral1(RD181+)	SRR1710074	Eastern-Asia	NA	NA	Luo et al., 2015
SAMN03263107	Asia-Ancestral3	SRR1710075	Eastern-Asia	NA	NA	Luo et al., 2015
SAMN03263108	Asia-Ancestral1(RD181+)	SRR1710076	Eastern-Asia	NA	NA	Luo et al., 2015
SAMN03263109	Asia-Ancestral1(RD181+)	SRR1710077	Eastern-Asia	NA	NA	Luo et al., 2015
SAMN03263110	Asia-Ancestral3	SRR1710078	Eastern-Asia	NA	NA	Luo et al., 2015
SAMN03263111	Asia-Ancestral1(RD181+)	SRR1710079	Eastern-Asia	NA	NA	Luo et al., 2015
SAMN03263112	Asia-Ancestral3	SRR1710080	Eastern-Asia	NA	NA	Luo et al., 2015
SAMN03263113	Asia-Ancestral3	SRR1710081	Eastern-Asia	NA	NA	Luo et al., 2015
SAMN03263114	Asia-Ancestral3	SRR1710082	Eastern-Asia	NA	NA	Luo et al., 2015
SAMN03263115	Asia-Ancestral1(RD181+)	SRR1710083	Eastern-Asia	NA	NA	Luo et al., 2015
SAMN03263116	Asia-Ancestral3	SRR1710084	Eastern-Asia	NA	NA	Luo et al., 2015
SAMN03263117	Asia-Ancestral3	SRR1710085	Eastern-Asia	NA	NA	Luo et al., 2015
SAMN03263118	Asia-Ancestral3	SRR1710086	Eastern-Asia	NA	NA	Luo et al., 2015
SAMN03263119	Asia-Ancestral3	SRR1710087	Eastern-Asia	NA	NA	Luo et al., 2015
SAMN03263120	Asia-Ancestral3	SRR1710088	Eastern-Asia	NA	NA	Luo et al., 2015
SAMN03263121	Asia-Ancestral3	SRR1710089	Eastern-Asia	NA	NA	Luo et al., 2015
SAMN03263122	Asia-Ancestral3	SRR1710090	Eastern-Asia	NA	NA	Luo et al., 2015
SAMN03263124	Asia-Ancestral3	SRR1710092	Eastern-Asia	NA	NA	Luo et al., 2015
SAMN03263125	Asia-Ancestral1(RD181+)	SRR1710093	Eastern-Asia	NA	NA	Luo et al., 2015
SAMN03263126	Asia-Ancestral3	SRR1710094	Eastern-Asia	NA	NA	Luo et al., 2015
SAMN03263127	Asia-Ancestral1(RD181+)	SRR1710095	Eastern-Asia	NA	NA	Luo et al., 2015
SAMN03263129	Asian-African1	SRR1710097	Eastern-Asia	NA	NA	Luo et al., 2015
SAMN03263131	Asia-Ancestral3	SRR1710099	Eastern-Asia	NA	NA	Luo et al., 2015
SAMN03263132	Asia-Ancestral3	SRR1710100	Eastern-Asia	NA	NA	Luo et al., 2015
SAMN03263133	Asia-Ancestral3	SRR1710101	Eastern-Asia	NA	NA	Luo et al., 2015
SAMN03263134	Asia-Ancestral1(RD181+)	SRR1710102	Eastern-Asia	NA	NA	Luo et al., 2015
SAMN03263136	Other	SRR1710104	Eastern-Asia	NA	NA	Luo et al., 2015
SAMN03263137	Asia-Ancestral1(RD181+)	SRR1710105	Eastern-Asia	NA	NA	Luo et al., 2015
SAMN03263138	Asia-Ancestral3	SRR1710106	Eastern-Asia	NA	NA	Luo et al., 2015
SAMN03263139	Asia-Ancestral3	SRR1710107	Eastern-Asia	NA	NA	Luo et al., 2015
SAMN03263140	Asia-Ancestral3	SRR1710108	Eastern-Asia	NA	NA	Luo et al., 2015
SAMN03263141	Other	SRR1710109	Eastern-Asia	NA	NA	Luo et al., 2015
SAMN03263142	Other	SRR1710110	Eastern-Asia	NA	NA	Luo et al., 2015
SAMN03263143	Asia-Ancestral1(RD181+)	SRR1710111	Eastern-Asia	NA	NA	Luo et al., 2015
SAMN03263144	Other	SRR1710112	Eastern-Asia	NA	NA	Luo et al., 2015
SAMN02339311	Other	SRR960951	Eastern-Asia	NA	NA	Luo et al., 2015
SAMN02339312	Other	SRR960955	Eastern-Asia	NA	NA	Luo et al., 2015
SAMN02339313	Other	SRR960956	Eastern-Asia	NA	NA	Luo et al., 2015
SAMN02339314	Other	SRR960957	Eastern-Asia	NA	NA	Luo et al., 2015
SAMN02339330	Asian-African2	SRR960958	Eastern-Asia	NA	NA	Luo et al., 2015
SAMN02339316	Other	SRR960960	Eastern-Asia	NA	NA	Luo et al., 2015
SAMN02339317	Other	SRR960961	Eastern-Asia	NA	NA	Luo et al., 2015
SAMN02339318	Other	SRR960962	Eastern-Asia	NA	NA	Luo et al., 2015
SAMN02339319	Other	SRR960963	Eastern-Asia	NA	NA	Luo et al., 2015
SAMN02339320	Other	SRR960966	Eastern-Asia	NA	NA	Luo et al., 2015
SAMN02339331	Asian-African2	SRR960967	Eastern-Asia	NA	NA	Luo et al., 2015
SAMN02339332	Asian-African2	SRR960968	Eastern-Asia	NA	NA	Luo et al., 2015
SAMN02339321	Other	SRR960969	Eastern-Asia	NA	NA	Luo et al., 2015
SAMN02339322	Other	SRR960970	Eastern-Asia	NA	NA	Luo et al., 2015
SAMN02339333	Asian-African2	SRR960971	Eastern-Asia	NA	NA	Luo et al., 2015
SAMN02339334	Asian-African2	SRR960978	Eastern-Asia	NA	NA	Luo et al., 2015
SAMN02339323	Other	SRR960979	Eastern-Asia	NA	NA	Luo et al., 2015
SAMN02339324	Other	SRR960980	Eastern-Asia	NA	NA	Luo et al., 2015
SAMN02339335	Asian-African2	SRR960981	Eastern-Asia	NA	NA	Luo et al., 2015
SAMN02339325	Other	SRR960982	Eastern-Asia	NA	NA	Luo et al., 2015
SAMN02339337	Asian-African2	SRR960983	Eastern-Asia	NA	NA	Luo et al., 2015
SAMN02339336	Asian-African2	SRR960984	Eastern-Asia	NA	NA	Luo et al., 2015
SAMN02339326	Other	SRR960985	Eastern-Asia	NA	NA	Luo et al., 2015
SAMN02339328	Other	SRR960986	Eastern-Asia	NA	NA	Luo et al., 2015
SAMN02339339	Pacific-RD150	SRR960987	Eastern-Asia	NA	NA	Luo et al., 2015
SAMN02339340	Pacific-RD150	SRR960988	Eastern-Asia	NA	NA	Luo et al., 2015
SAMN02339341	Pacific-RD150	SRR960989	Eastern-Asia	NA	NA	Luo et al., 2015
SAMN02339338	Pacific-RD150	SRR960990	Eastern-Asia	NA	NA	Luo et al., 2015
SAMN02339327	Other	SRR960991	Eastern-Asia	NA	NA	Luo et al., 2015
SAMN02339329	Asian-African2	SRR960992	Eastern-Asia	NA	NA	Luo et al., 2015
SAMN01908743	Asian-African2	SRR671719	Eastern-Asia	NA	NA	Zhang et al., 2013
SAMN01908744	Other	SRR671720	Eastern-Asia	NA	NA	Zhang et al., 2013
SAMN01908745	Other	SRR671721	Eastern-Asia	NA	NA	Zhang et al., 2013
SAMN01908746	Asia-Ancestral3	SRR671722	Eastern-Asia	NA	NA	Zhang et al., 2013
SAMN01908747	Other	SRR671723	Eastern-Asia	NA	NA	Zhang et al., 2013
SAMN01908748	Asian-African3	SRR671724	Eastern-Asia	NA	NA	Zhang et al., 2013
SAMN01908750	Other	SRR671726	Eastern-Asia	NA	NA	Zhang et al., 2013
SAMN01908772	Asian-African3	SRR671748	Eastern-Asia	NA	NA	Zhang et al., 2013
SAMN01908776	Other	SRR671752	Eastern-Asia	NA	NA	Zhang et al., 2013
SAMN01908777	Asia-Ancestral1(RD181+)	SRR671753	Eastern-Asia	NA	NA	Zhang et al., 2013
SAMN01908778	Asia-Ancestral3	SRR671754	Eastern-Asia	NA	NA	Zhang et al., 2013
SAMN01908779	Other	SRR671755	Eastern-Asia	NA	NA	Zhang et al., 2013
SAMN01908780	Other	SRR671756	Eastern-Asia	NA	NA	Zhang et al., 2013
SAMN01908782	Pacific-RD150	SRR671758	Eastern-Asia	NA	NA	Zhang et al., 2013
SAMN01908783	Other	SRR671759	Eastern-Asia	NA	NA	Zhang et al., 2013
SAMN01908785	Pacific-RD150	SRR671761	Eastern-Asia	NA	NA	Zhang et al., 2013
SAMN01908789	Asia-Ancestral3	SRR671765	Eastern-Asia	NA	NA	Zhang et al., 2013
SAMN01908794	Asia-Ancestral3	SRR671770	Eastern-Asia	NA	NA	Zhang et al., 2013
SAMN01908795	Asian-African2	SRR671771	Eastern-Asia	NA	NA	Zhang et al., 2013
SAMN01908805	Other	SRR671781	Eastern-Asia	NA	NA	Zhang et al., 2013
SAMN01908807	Asia-Ancestral2	SRR671783	Eastern-Asia	NA	NA	Zhang et al., 2013
SAMN01908808	Asian-African2	SRR671784	Eastern-Asia	NA	NA	Zhang et al., 2013
SAMN01908809	Other	SRR671785	Eastern-Asia	NA	NA	Zhang et al., 2013
SAMN01908810	Pacific-RD150	SRR671786	Eastern-Asia	NA	NA	Zhang et al., 2013
SAMN01908811	Other	SRR671787	Eastern-Asia	NA	NA	Zhang et al., 2013
SAMN01908812	Asian-African3	SRR671788	Eastern-Asia	NA	NA	Zhang et al., 2013
SAMN01908815	Asian-African2	SRR671791	Eastern-Asia	NA	NA	Zhang et al., 2013
SAMN01908816	Other	SRR671792	Eastern-Asia	NA	NA	Zhang et al., 2013
SAMN01908817	Asian-African3	SRR671793	Eastern-Asia	NA	NA	Zhang et al., 2013
SAMN01908818	Asian-African2	SRR671794	Eastern-Asia	NA	NA	Zhang et al., 2013
SAMN01908819	Asia-Ancestral3	SRR671795	Eastern-Asia	NA	NA	Zhang et al., 2013
SAMN01908820	Other	SRR671796	Eastern-Asia	NA	NA	Zhang et al., 2013
SAMN01908821	Asia-Ancestral1(RD181+)	SRR671797	Eastern-Asia	NA	NA	Zhang et al., 2013
SAMN01908822	Asia-Ancestral3	SRR671798	Eastern-Asia	NA	NA	Zhang et al., 2013
SAMN01908823	Other	SRR671799	Eastern-Asia	NA	NA	Zhang et al., 2013
SAMN01908824	Asian-African2	SRR671800	Eastern-Asia	NA	NA	Zhang et al., 2013
SAMN01908825	Asian-African2	SRR671801	Eastern-Asia	NA	NA	Zhang et al., 2013
SAMN01908826	Asian-African2	SRR671802	Eastern-Asia	NA	NA	Zhang et al., 2013
SAMN01908827	Asian-African2	SRR671803	Eastern-Asia	NA	NA	Zhang et al., 2013
SAMN01908828	Asia-Ancestral1(RD181+)	SRR671804	Eastern-Asia	NA	NA	Zhang et al., 2013
SAMN01908829	Other	SRR671805	Eastern-Asia	NA	NA	Zhang et al., 2013
SAMN01908830	Central-Asia	SRR671806	Eastern-Asia	NA	NA	Zhang et al., 2013
SAMN01908831	Asian-African2	SRR671807	Eastern-Asia	NA	NA	Zhang et al., 2013
SAMN01908832	Asian-African2	SRR671808	Eastern-Asia	NA	NA	Zhang et al., 2013
SAMN01908833	Other	SRR671809	Eastern-Asia	NA	NA	Zhang et al., 2013
SAMN01908834	Asian-African2	SRR671810	Eastern-Asia	NA	NA	Zhang et al., 2013
SAMN01908835	Other	SRR671811	Eastern-Asia	NA	NA	Zhang et al., 2013
SAMN01908836	Other	SRR671812	Eastern-Asia	NA	NA	Zhang et al., 2013
SAMN01908837	Asia-Ancestral1(RD181+)	SRR671813	Eastern-Asia	NA	NA	Zhang et al., 2013
SAMN01908838	Asian-African2	SRR671814	Eastern-Asia	NA	NA	Zhang et al., 2013
SAMN01908839	Other	SRR671815	Eastern-Asia	NA	NA	Zhang et al., 2013
SAMN01908841	Asian-African2	SRR671817	Eastern-Asia	NA	NA	Zhang et al., 2013
SAMN01908842	Asia-Ancestral3	SRR671818	Eastern-Asia	NA	NA	Zhang et al., 2013
SAMN01908843	Other	SRR671819	Eastern-Asia	NA	NA	Zhang et al., 2013
SAMN01908844	Other	SRR671820	Eastern-Asia	NA	NA	Zhang et al., 2013
SAMN01908845	Other	SRR671821	Eastern-Asia	NA	NA	Zhang et al., 2013
SAMN01908846	Other	SRR671822	Eastern-Asia	NA	NA	Zhang et al., 2013
SAMN01908847	Other	SRR671823	Eastern-Asia	NA	NA	Zhang et al., 2013
SAMN01908849	Other	SRR671825	Eastern-Asia	NA	NA	Zhang et al., 2013
SAMN01908850	Asian-African2	SRR671826	Eastern-Asia	NA	NA	Zhang et al., 2013
SAMN01908851	Other	SRR671827	Eastern-Asia	NA	NA	Zhang et al., 2013
SAMN01908852	Other	SRR671828	Eastern-Asia	NA	NA	Zhang et al., 2013
SAMN01908853	Other	SRR671829	Eastern-Asia	NA	NA	Zhang et al., 2013
SAMN01908854	Pacific-RD150	SRR671830	Eastern-Asia	NA	NA	Zhang et al., 2013
SAMN01908858	Other	SRR671834	Eastern-Asia	NA	NA	Zhang et al., 2013
SAMN01908860	Other	SRR671836	Eastern-Asia	NA	NA	Zhang et al., 2013
SAMN01908861	Other	SRR671837	Eastern-Asia	NA	NA	Zhang et al., 2013
SAMN01908863	Other	SRR671839	Eastern-Asia	NA	NA	Zhang et al., 2013
SAMN01908864	Asia-Ancestral3	SRR671840	Eastern-Asia	NA	NA	Zhang et al., 2013
SAMN01908865	Pacific-RD150	SRR671841	Eastern-Asia	NA	NA	Zhang et al., 2013
SAMN01908866	Other	SRR671842	Eastern-Asia	NA	NA	Zhang et al., 2013
SAMN01908867	Other	SRR671843	Eastern-Asia	NA	NA	Zhang et al., 2013
SAMN01908868	Other	SRR671844	Eastern-Asia	NA	NA	Zhang et al., 2013
SAMN01908869	Asia-Ancestral3	SRR671845	Eastern-Asia	NA	NA	Zhang et al., 2013
SAMN01908871	Other	SRR671847	Eastern-Asia	NA	NA	Zhang et al., 2013
SAMN01908872	Other	SRR671848	Eastern-Asia	NA	NA	Zhang et al., 2013
SAMN01908875	Other	SRR671851	Eastern-Asia	NA	NA	Zhang et al., 2013
SAMN01908876	Other	SRR671852	Eastern-Asia	NA	NA	Zhang et al., 2013
SAMN01908878	Other	SRR671854	Eastern-Asia	NA	NA	Zhang et al., 2013
SAMN01908879	Asia-Ancestral1(RD181+)	SRR671855	Eastern-Asia	NA	NA	Zhang et al., 2013
SAMN01908880	Asian-African2	SRR671856	Eastern-Asia	NA	NA	Zhang et al., 2013
SAMN01908881	Asia-Ancestral1(RD181+)	SRR671857	Eastern-Asia	NA	NA	Zhang et al., 2013
SAMN01908882	Asian-African2	SRR671858	Eastern-Asia	NA	NA	Zhang et al., 2013
SAMN01908887	Asia-Ancestral3	SRR671863	Eastern-Asia	NA	NA	Zhang et al., 2013
SAMN01908889	Asian-African2	SRR671865	Eastern-Asia	NA	NA	Zhang et al., 2013
SAMN01908890	Other	SRR671866	Eastern-Asia	NA	NA	Zhang et al., 2013
SAMN01908891	Asian-African2	SRR671867	Eastern-Asia	NA	NA	Zhang et al., 2013
SAMN01908893	Asian-African2	SRR671869	Eastern-Asia	NA	NA	Zhang et al., 2013
SAMN01908894	Asian-African2	SRR671870	Eastern-Asia	NA	NA	Zhang et al., 2013
SAMN01908895	Asia-Ancestral3	SRR671871	Eastern-Asia	NA	NA	Zhang et al., 2013
SAMN01908899	Other	SRR671875	Eastern-Asia	NA	NA	Zhang et al., 2013
SAMN01908900	Asian-African2	SRR671876	Eastern-Asia	NA	NA	Zhang et al., 2013
SAMN01908901	Asia-Ancestral2	SRR671877	Eastern-Asia	NA	NA	Zhang et al., 2013
SAMN01908903	Other	SRR671879	Eastern-Asia	NA	NA	Zhang et al., 2013
SAMEA1016039	Europe/Russia/B0/W148	ERR067696	Eastern-Europe	NA	2008	Casali et al., 2014
SAMEA1404012	Europe/Russia/B0/W148	ERR117454	Eastern-Europe	NA	2009	Casali et al., 2014
SAMEA1707118	Europe/Russia/B0/W148	ERR234632	Eastern-Europe	NA	2008	Casali et al., 2014
SAMEA1469509	Europe/Russia/B0/W148	ERR158608	Eastern-Europe	NA	2011	Casali et al., 2014
SAMEA1404027	Europe/Russia/B0/W148	ERR117456	Eastern-Europe	NA	2009	Casali et al., 2014
SAMEA1403641	Europe/Russia/B0/W148	ERR133815	Eastern-Europe	NA	2008	Casali et al., 2014
SAMEA1403693	Europe/Russia/B0/W148	ERR108514	Eastern-Europe	NA	2008	Casali et al., 2014
SAMEA1469515	Europe/Russia/B0/W148	ERR158589	Eastern-Europe	NA	2009	Casali et al., 2014
SAMEA1015957	Europe/Russia/B0/W148	ERR067667	Eastern-Europe	NA	NA	Casali et al., 2014
SAMEA1016196	Europe/Russia/B0/W148	ERR067644	Eastern-Europe	NA	2009	Casali et al., 2014
SAMEA1707242	Europe/Russia/B0/W148	ERR234600	Eastern-Europe	NA	2008	Casali et al., 2014
SAMEA1707137	Europe/Russia/B0/W148	ERR234662	Eastern-Europe	NA	2010	Casali et al., 2014
SAMEA1016078	Europe/Russia/B0/W148	ERR067588	Eastern-Europe	NA	2008	Casali et al., 2014
SAMEA1707543	Europe/Russia/B0/W148	ERR234584	Eastern-Europe	NA	2008	Casali et al., 2014
SAMEA1707397	Other	ERR229920	Eastern-Europe	NA	2010	Casali et al., 2014
SAMEA1707279	Central-Asia	ERR229926	Eastern-Europe	NA	2010	Casali et al., 2014
SAMEA1403785	Central-Asia	ERR144596	Eastern-Europe	NA	2009	Casali et al., 2014
SAMEA1403893	Central-Asia	ERR133966	Eastern-Europe	NA	2009	Casali et al., 2014
SAMEA1016185	Central-Asia	ERR067705	Eastern-Europe	NA	2009	Casali et al., 2014
SAMEA1403932	Central-Asia	ERR144608	Eastern-Europe	NA	2009	Casali et al., 2014
SAMEA1016044	Central-Asia	ERR067713	Eastern-Europe	NA	2009	Casali et al., 2014
SAMEA1707435	Central-Asia	ERR229915	Eastern-Europe	NA	2010	Casali et al., 2014
SAMEA1403753	Central-Asia	ERR137264	Eastern-Europe	NA	2009	Casali et al., 2014
SAMEA1403783	Central-Asia	ERR144622	Eastern-Europe	NA	2009	Casali et al., 2014
SAMEA1403879	Central-Asia	ERR133963	Eastern-Europe	NA	2009	Casali et al., 2014
SAMEA1403837	Central-Asia	ERR133856	Eastern-Europe	NA	2008	Casali et al., 2014
SAMEA1403850	Central-Asia	ERR133924	Eastern-Europe	NA	2009	Casali et al., 2014
SAMEA1403841	Central-Asia	ERR108479	Eastern-Europe	NA	2009	Casali et al., 2014
SAMEA1469492	Central-Asia	ERR158572	Eastern-Europe	NA	2009	Casali et al., 2014
SAMEA1403580	Central-Asia	ERR137216	Eastern-Europe	NA	2009	Casali et al., 2014
SAMEA1403957	Central-Asia	ERR137195	Eastern-Europe	NA	2009	Casali et al., 2014
SAMEA1707379	Central-Asia	ERR234617	Eastern-Europe	NA	2009	Casali et al., 2014
SAMEA1707203	Central-Asia	ERR229970	Eastern-Europe	NA	2010	Casali et al., 2014
SAMEA1403782	Central-Asia	ERR133932	Eastern-Europe	NA	2009	Casali et al., 2014
SAMEA1016172	Central-Asia	ERR067686	Eastern-Europe	NA	NA	Casali et al., 2014
SAMEA1707162	Central-Asia	ERR234690	Eastern-Europe	NA	2010	Casali et al., 2014
SAMEA1403705	Central-Asia	ERR144572	Eastern-Europe	NA	2009	Casali et al., 2014
SAMEA1403936	Central-Asia	ERR108500	Eastern-Europe	NA	2008	Casali et al., 2014
SAMEA1403860	Central-Asia	ERR144616	Eastern-Europe	NA	2009	Casali et al., 2014
SAMEA1707237	Central-Asia	ERR227999	Eastern-Europe	NA	2010	Casali et al., 2014
SAMEA1403953	Central-Asia	ERR144606	Eastern-Europe	NA	2009	Casali et al., 2014
SAMEA1403645	Central-Asia	ERR144558	Eastern-Europe	NA	2009	Casali et al., 2014
SAMEA1469490	Central-Asia	ERR158570	Eastern-Europe	NA	2009	Casali et al., 2014
SAMEA1707286	Central-Asia	ERR234575	Eastern-Europe	NA	2008	Casali et al., 2014
SAMEA1016109	Central-Asia	ERR067622	Eastern-Europe	NA	2008	Casali et al., 2014
SAMEA1403988	Central-Asia	ERR137277	Eastern-Europe	NA	2009	Casali et al., 2014
SAMEA1016124	Central-Asia	ERR067761	Eastern-Europe	NA	2008	Casali et al., 2014
SAMEA1015962	Central-Asia	ERR067653	Eastern-Europe	NA	2009	Casali et al., 2014
SAMEA1404004	Central-Asia	ERR137223	Eastern-Europe	NA	2009	Casali et al., 2014
SAMEA1403960	Other	ERR137252	Eastern-Europe	NA	2009	Casali et al., 2014
SAMEA1469511	Pacific-RD150	ERR158609	Eastern-Europe	NA	2011	Casali et al., 2014
SAMEA1707253	Asia-Ancestral2	ERR234658	Eastern-Europe	NA	2010	Casali et al., 2014
SAMEA838018	Europe/Russia/B0/W148	ERR027447	Eastern-Europe	NA	NA	Casali et al., 2012
SAMEA837955	Europe/Russia/B0/W148	ERR027448	Eastern-Europe	NA	NA	Casali et al., 2012
SAMEA838028	Europe/Russia/B0/W148	ERR015611	Eastern-Europe	NA	NA	Casali et al., 2012
SAMEA837936	Other	ERR027454	Eastern-Europe	NA	NA	Casali et al., 2012
SAMEA838034	Central-Asia	ERR015616	Eastern-Europe	NA	NA	Casali et al., 2012
SAMEA837963	Central-Asia	ERR017786	Eastern-Europe	NA	NA	Casali et al., 2012
SAMEA838004	Central-Asia	ERR019572	Eastern-Europe	NA	NA	Casali et al., 2012
SAMEA838044	Central-Asia	ERR015612	Eastern-Europe	NA	NA	Casali et al., 2012
SAMEA838040	Central-Asia	ERR015609	Eastern-Europe	NA	NA	Casali et al., 2012
SAMEA837938	Central-Asia	ERR027446	Eastern-Europe	NA	NA	Casali et al., 2012
SAMEA838046	Central-Asia	ERR019552	Eastern-Europe	NA	NA	Casali et al., 2012
SAMEA837998	Central-Asia	ERR027463	Eastern-Europe	NA	NA	Casali et al., 2012
SAMEA837944	Central-Asia	ERR027450	Eastern-Europe	NA	NA	Casali et al., 2012
1455A	Other	NA	Southern-Asia	NA	2010	This study
1470C	Other	NA	Southern-Asia	NA	2010	This study
1830B	Other	NA	Southern-Asia	NA	2010	This study
2241C	Other	NA	Southern-Asia	NA	2010	This study
2440C	Other	NA	Southern-Asia	NA	2010	This study
695B	Asia-Ancestral3	NA	Southern-Asia	NA	2009	This study
1602C	Other	NA	Southern-Asia	NA	2009	This study
5726	Other	NA	Southern-Asia	NA	NA	This study
1298B	Asian-African2	NA	Southern-Asia	NA	2009	This study
2141AC	Other	NA	Southern-Asia	NA	2009	This study
2245C	Other	NA	Southern-Asia	NA	2009	This study
1194C	Asian-African2	NA	Southern-Asia	NA	2010	This study
2510C	Other	NA	Southern-Asia	NA	2010	This study
2339D	Other	NA	Southern-Asia	NA	2010	This study
2814C	Other	NA	Southern-Asia	NA	2010	This study
2575C	Other	NA	Southern-Asia	NA	2010	This study
2499C	Other	NA	Southern-Asia	NA	2010	This study
2032	Other	NA	Southern-Asia	NA	2010	This study
2873D	Other	NA	Southern-Asia	NA	2010	This study
2841C	Other	NA	Southern-Asia	NA	2010	This study
1930C	Other	NA	Southern-Asia	NA	2010	This study
2017B	Other	NA	Southern-Asia	NA	2010	This study
2759F2	Other	NA	Southern-Asia	NA	2010	This study
1614C	Other	NA	Southern-Asia	NA	2010	This study
1909F2	Other	NA	Southern-Asia	NA	2010	This study
2308B	Other	NA	Southern-Asia	NA	2010	This study
2695	Asian-African2	NA	Southern-Asia	NA	2010	This study
2086B	Other	NA	Southern-Asia	NA	2010	This study
2310D	Other	NA	Southern-Asia	NA	2010	This study
3093E	Other	NA	Southern-Asia	NA	2010	This study
542	Other	NA	Southern-Asia	NA	2010	This study
2066B	Asia-Ancestral3	NA	Southern-Asia	NA	2010	This study
1681F	Asia-Ancestral3	NA	Southern-Asia	NA	2010	This study
2102C	Other	NA	Southern-Asia	NA	2010	This study
2570B	Other	NA	Southern-Asia	NA	2010	This study
2456B	Other	NA	Southern-Asia	NA	2010	This study
1873B	Other	NA	Southern-Asia	NA	2010	This study
SAMEA2533363	Asia-Ancestral3	ERR550643;ERR550644	Western-Europe	NA	2008	Merker et al., 2015
SAMEA2533372	Central-Asia	ERR550658;ERR550659	Central-Asia	NA	2005	Merker et al., 2015
SAMEA2533380	Asia-Ancestral2	ERR550670	Western-Asia	NA	2005	Merker et al., 2015
SAMEA2533423	Central-Asia	ERR550724	Central-Asia	NA	2005	Merker et al., 2015
SAMEA2533434	Other	ERR550738	Southeastern-Asia	NA	NA	Merker et al., 2015
SAMEA2533435	Other	ERR550739	Southern-Africa	M13	2004	Merker et al., 2015
SAMEA2533463	Central-Asia	ERR550777;ERR550778;ERR550779	Central-Asia	NA	2005	Merker et al., 2015
SAMEA2533465	Central-Asia	ERR550782;ERR550783	Central-Asia	NA	2001	Merker et al., 2015
SAMEA2533542	Central-Asia	ERR550887	Central-Asia	NA	2005	Merker et al., 2015
SAMEA2533555	Asian-African2	ERR550910	Eastern-Asia	NA	2007	Merker et al., 2015
SAMEA2533569	Asia-Ancestral3	ERR550927	Eastern-Asia	NA	2004	Merker et al., 2015
SAMEA2533580	Asian-African1	ERR550940;ERR550941	Southeastern-Asia	NA	2011	Merker et al., 2015
SAMEA2533583	Asia-Ancestral3	ERR550946;ERR550947	Oceania	NA	2005	Merker et al., 2015
SAMEA2533593	Pacific-RD150	ERR550957	Southern-Africa	M8	2010	Merker et al., 2015
SAMEA2533609	Central-Asia	ERR550984	Central-Asia	NA	2001	Merker et al., 2015
SAMEA2533628	Asian-African2	ERR551007	Eastern-Europe	NA	2008	Merker et al., 2015
SAMEA2533675	Pacific-RD150	ERR551071	Southern-Africa	M8	2009	Merker et al., 2015
SAMEA2533682	Asian-African2	ERR551079	Southern-Africa	M10	2009	Merker et al., 2015
SAMEA2533688	Asia-Ancestral1(RD181+)	ERR551086	Southeastern-Asia	NA	2003	Merker et al., 2015
SAMEA2533692	Europe/Russia/B0/W148	ERR551090	Eastern-Europe	NA	2006	Merker et al., 2015
SAMEA2533740	Pacific-RD150	ERR551155;ERR551156	Southeastern-Asia	NA	2011	Merker et al., 2015
SAMEA2533743	Central-Asia	ERR551159	Central-Asia	NA	2004	Merker et al., 2015
SAMEA2533751	Central-Asia	ERR551167;ERR551168	Central-Asia	NA	2001	Merker et al., 2015
SAMEA2533759	Asia-Ancestral1(RD181+)	ERR551184;ERR551185	Western-Europe	NA	2009	Merker et al., 2015
SAMEA2533772	Central-Asia	ERR551201	Central-Asia	NA	2002	Merker et al., 2015
SAMEA2533777	Europe/Russia/B0/W148	ERR551212	Eastern-Europe	NA	NA	Merker et al., 2015
SAMEA2533779	Central-Asia	ERR551214	Central-Asia	NA	2002	Merker et al., 2015
SAMEA2533789	Asia-Ancestral3	ERR551225	Southeastern-Asia	NA	2006	Merker et al., 2015
SAMEA2533840	Central-Asia	ERR551293	Central-Asia	NA	2008	Merker et al., 2015
SAMEA2533849	Central-Asia	ERR551305	Central-Asia	NA	2005	Merker et al., 2015
SAMEA2533850	Europe/Russia/B0/W148	ERR551311	Eastern-Europe	NA	1995	Merker et al., 2015
SAMEA2533887	Central-Asia	ERR551360;ERR551361;ERR551362	Central-Asia	NA	2005	Merker et al., 2015
SAMEA2533893	Other	ERR551369;ERR551370	Southern-Europe	NA	NA	Merker et al., 2015
SAMEA2533923	Asia-Ancestral3	ERR551412	Western-Africa	NA	2003	Merker et al., 2015
SAMEA2533982	Europe/Russia/B0/W148	ERR551494	Central-Asia	NA	2002	Merker et al., 2015
SAMEA2533997	Other	ERR551520	Southern-Asia	NA	2007	Merker et al., 2015
SAMEA2534018	Pacific-RD150	ERR551549	Western-Europe	NA	2007	Merker et al., 2015
SAMEA2534023	Europe/Russia/B0/W148	ERR551554	Western-Asia	NA	2005	Merker et al., 2015
SAMEA2534025	Central-Asia	ERR551556;ERR551557;ERR551558	Central-Asia	NA	2005	Merker et al., 2015
SAMEA2534036	Asia-Ancestral3	ERR551572	Western-Europe	NA	2002	Merker et al., 2015
SAMEA2534040	Central-Asia	ERR551575	Central-Asia	NA	2005	Merker et al., 2015
SAMEA2534085	Asia-Ancestral1(RD181+)	ERR551636	Central-Asia	NA	2001	Merker et al., 2015
SAMEA2534086	Central-Asia	ERR551638	Central-Asia	NA	2004	Merker et al., 2015
SAMEA2534112	Pacific-RD150	ERR551680;ERR551681	Oceania	NA	2010	Merker et al., 2015
SAMEA2534120	Pacific-RD150	ERR551688	Oceania	NA	2010	Merker et al., 2015
SAMEA2534126	Pacific-RD150	ERR551693;ERR551694	Southeastern-Asia	NA	2002	Merker et al., 2015
SAMEA2534182	Central-Asia	ERR551772	Central-Asia	NA	2002	Merker et al., 2015
SAMEA2534205	Central-Asia	ERR551804;ERR551805;ERR551806	Central-Asia	NA	2005	Merker et al., 2015
SAMEA2534216	Central-Asia	ERR551821;ERR551822	Central-Asia	NA	2005	Merker et al., 2015
SAMEA2534241	Asian-African2	ERR551854;ERR551855	Southern-Africa	M9	2009	Merker et al., 2015
SAMEA2534262	Central-Asia	ERR551879	Central-Asia	NA	2002	Merker et al., 2015
SAMEA2534295	Pacific-RD150	ERR551927;ERR551928	Southeastern-Asia	NA	2002	Merker et al., 2015
SAMEA2534297	Asian-African2	ERR551930	Southeastern-Asia	NA	2011	Merker et al., 2015
SAMEA2534301	Asian-African1	ERR551934	Western-Africa	NA	2007	Merker et al., 2015
SAMEA2534307	Central-Asia	ERR551943;ERR551944;ERR551945	Central-Asia	NA	2005	Merker et al., 2015
SAMEA2534314	Asia-Ancestral2	ERR551956;ERR551957	Eastern-Europe	NA	2006	Merker et al., 2015
SAMEA2534329	Asian-African3	ERR551977;ERR551978	Eastern-Asia	NA	2003	Merker et al., 2015
SAMEA2534335	Asian-African2	ERR551990	Western-Europe	NA	2005	Merker et al., 2015
SAMEA2534405	Europe/Russia/B0/W148	ERR552090	Western-Europe	NA	2009	Merker et al., 2015
SAMEA2534433	Central-Asia	ERR552130	Southern-Asia	NA	2007	Merker et al., 2015
SAMEA2534438	Europe/Russia/B0/W148	ERR552136	Eastern-Europe	NA	1995	Merker et al., 2015
SAMEA2534441	Europe/Russia/B0/W148	ERR552141	Eastern-Europe	NA	1995	Merker et al., 2015
SAMEA2534464	Asia-Ancestral1(RD181+)	ERR552177	Eastern-Asia	NA	2006	Merker et al., 2015
SAMEA2534474	Asian-African3	ERR552190	Southeastern-Asia	NA	2005	Merker et al., 2015
SAMEA2534477	Central-Asia	ERR552194	Western-Asia	NA	2006	Merker et al., 2015
SAMEA2534492	Asia-Ancestral2	ERR552219	Western-Asia	NA	2003	Merker et al., 2015
SAMEA2534570	Other	ERR552331	Southern-America	NA	NA	Merker et al., 2015
SAMEA2534593	Central-Asia	ERR552358	Central-Asia	NA	2005	Merker et al., 2015
SAMEA2534642	Europe/Russia/B0/W148	ERR552429	Eastern-Europe	NA	2008	Merker et al., 2015
SAMEA2534653	Asia-Ancestral1(RD181+)	ERR552444;ERR552445	Oceania	NA	2010	Merker et al., 2015
SAMEA2534676	Central-Asia	ERR552479	Central-Asia	NA	2002	Merker et al., 2015
SAMEA2534677	Europe/Russia/B0/W148	ERR552482	Western-Asia	NA	2003	Merker et al., 2015
SAMEA2534687	Central-Asia	ERR552493;ERR552494	Central-Asia	NA	2001	Merker et al., 2015
SAMEA2534726	Asia-Ancestral3	ERR552549;ERR552550	Southeastern-Asia	NA	2011	Merker et al., 2015
SAMEA2534730	Other	ERR552555	Western-Europe	NA	1995	Merker et al., 2015
SAMEA2534744	Europe/Russia/B0/W148	ERR552580	Central-Asia	NA	2004	Merker et al., 2015
SAMEA2534809	Europe/Russia/B0/W148	ERR552668;ERR552669;ERR552670;ERR552671	Western-Europe	NA	2003	Merker et al., 2015
SAMEA2534823	Pacific-RD150	ERR552689;ERR552690	Southeastern-Asia	NA	2003	Merker et al., 2015
SAMEA2534866	Asian-African2	ERR552743	Southern-Africa	M9	2009	Merker et al., 2015
SAMEA2534880	Asia-Ancestral1(RD181+)	ERR552755	Southeastern-Asia	NA	2001	Merker et al., 2015
SAMEA2534884	Asia-Ancestral1(RD181+)	ERR552760	Central-Asia	NA	2002	Merker et al., 2015
SAMEA2534904	Other	ERR552787	Southern-America	NA	NA	Merker et al., 2015
SAMEA2534935	Other	ERR552830	Southeastern-Asia	NA	NA	Merker et al., 2015
SAMEA2534942	Asia-Ancestral1(RD181+)	ERR552838	Eastern-Asia	NA	2002	Merker et al., 2015
SAMEA2534985	Pacific-RD150	ERR552894;ERR552895	Oceania	NA	2010	Merker et al., 2015
SAMEA2534992	Central-Asia	ERR552907	Central-Asia	NA	2005	Merker et al., 2015
SAMEA2534993	Other	ERR552910;ERR552911	Central-Asia	NA	2001	Merker et al., 2015
SAMEA2534994	Asia-Ancestral1(RD181+)	ERR552912	Southeastern-Asia	NA	2005	Merker et al., 2015
SAMEA2535016	Central-Asia	ERR552939;ERR552940	Central-Asia	NA	2005	Merker et al., 2015
SAMEA2535025	Other	ERR552949	Western-Europe	NA	2002	Merker et al., 2015
SAMEA2535029	Asia-Ancestral3	ERR552954	Western-Europe	NA	1995	Merker et al., 2015
SAMEA2535113	Europe/Russia/B0/W148	ERR553068	Central-Asia	NA	2005	Merker et al., 2015
SAMEA2535125	Central-Asia	ERR553081;ERR553082	Southern-Asia	NA	2003	Merker et al., 2015
SAMEA2535126	Asian-African1	ERR553086	Eastern-Africa	M5	2006	Merker et al., 2015
SAMEA2535134	Central-Asia	ERR553098	Central-Asia	NA	2004	Merker et al., 2015
SAMEA2535142	Asia-Ancestral2	ERR553107	Southern-Asia	NA	2007	Merker et al., 2015
SAMEA2535152	Asian-African2	ERR553116	Southern-Africa	NA	2009	Merker et al., 2015
SAMEA2535166	Central-Asia	ERR553139	Central-Asia	NA	2004	Merker et al., 2015
SAMEA2535180	Asian-African2	ERR553156;ERR553157	Southern-Africa	M11	2009	Merker et al., 2015
SAMEA2535188	Other	ERR553171	Southern-Asia	NA	2005	Merker et al., 2015
SAMEA2535236	Europe/Russia/B0/W148	ERR553237	Western-Asia	NA	2005	Merker et al., 2015
SAMEA2535248	Central-Asia	ERR553251	Central-Asia	NA	2004	Merker et al., 2015
SAMEA2535265	Other	ERR553274;ERR553275	Southeastern-Asia	NA	2011	Merker et al., 2015
SAMEA2535268	Asian-African1	ERR553277	Southeastern-Asia	NA	2001	Merker et al., 2015
SAMEA2535280	Asian-African3	ERR553291	Eastern-Asia	NA	2004	Merker et al., 2015
SAMEA2535290	Pacific-RD150	ERR553303;ERR553304	Southeastern-Asia	NA	2007	Merker et al., 2015
SAMEA2535298	Asian-African2	ERR553313	Southern-Africa	M10	2009	Merker et al., 2015
SAMEA2535307	Asian-African2	ERR553324	Southern-Africa	M10	2009	Merker et al., 2015
SAMEA2533862	Asian-African2	ERR619080	Southern-Africa	M10	2009	Merker et al., 2015
SAMEA1556507	Other	ERR181918	Eastern-Africa	M13	2001	Guerra-Assun?╩o et al., 2015
SAMEA1688531	Other	ERR221634	Eastern-Africa	M6	NA	Guerra-Assun?╩o et al., 2015
SAMEA1530678	Asian-African3	ERR176606	Eastern-Africa	M6	1998	Guerra-Assun?╩o et al., 2015
SAMEA1688617	Other	ERR221545	Eastern-Africa	M13	2002	Guerra-Assun?╩o et al., 2015
SAMEA1688646	Other	ERR216961	Eastern-Africa	M3	2010	Guerra-Assun?╩o et al., 2015
SAMEA1569186	Other	ERR212014	Eastern-Africa	M3	1999	Guerra-Assun?╩o et al., 2015
SAMEA1485257	Other	ERR163959	Eastern-Africa	M3	2004	Guerra-Assun?╩o et al., 2015
SAMEA1556629	Asian-African3	ERR181965	Eastern-Africa	M6	2005	Guerra-Assun?╩o et al., 2015
SAMEA1688616	Other	ERR221544	Eastern-Africa	M13	2002	Guerra-Assun?╩o et al., 2015
SAMEA1688668	Asian-African3	ERR221631	Eastern-Africa	M6	NA	Guerra-Assun?╩o et al., 2015
SAMEA1569175	Other	ERR212120	Eastern-Africa	M13	2001	Guerra-Assun?╩o et al., 2015
SAMEA1688623	Other	ERR221655	Eastern-Africa	M13	NA	Guerra-Assun?╩o et al., 2015
SAMEA1708253	Asian-African2	ERR245692	Eastern-Africa	M10	2006	Guerra-Assun?╩o et al., 2015
SAMEA1569220	Asian-African3	ERR190386	Eastern-Africa	M6	1998	Guerra-Assun?╩o et al., 2015
SAMEA1688625	Other	ERR221658	Eastern-Africa	M13	NA	Guerra-Assun?╩o et al., 2015
SAMEA1688671	Other	ERR221633	Eastern-Africa	M13	NA	Guerra-Assun?╩o et al., 2015
SAMEA1556674	Other	ERR181916	Eastern-Africa	M13	2001	Guerra-Assun?╩o et al., 2015
SAMEA1688555	Asian-African3	ERR216951	Eastern-Africa	M6	NA	Guerra-Assun?╩o et al., 2015
SAMEA1530843	Asian-African3	ERR176641	Eastern-Africa	M6	1999	Guerra-Assun?╩o et al., 2015
SAMEA1556711	Asian-African3	ERR181905	Eastern-Africa	M6	2001	Guerra-Assun?╩o et al., 2015
SAMEA1688591	Other	ERR216963	Eastern-Africa	M3	NA	Guerra-Assun?╩o et al., 2015
SAMEA1556737	Asian-African3	ERR181870	Eastern-Africa	M6	1998	Guerra-Assun?╩o et al., 2015
SAMEA1688660	Other	ERR221538	Eastern-Africa	M13	NA	Guerra-Assun?╩o et al., 2015
SAMEA1688697	Other	ERR221574	Eastern-Africa	M13	2003	Guerra-Assun?╩o et al., 2015
SAMEA1688554	Other	ERR221558	Eastern-Africa	M13	2003	Guerra-Assun?╩o et al., 2015
SAMEA1556542	Asian-African2	ERR181941	Eastern-Africa	M10	2004	Guerra-Assun?╩o et al., 2015
SAMEA1569322	Asia-Ancestral3	ERR212145	Eastern-Africa	M2	2009	Guerra-Assun?╩o et al., 2015
SAMEA1556531	Other	ERR181769	Eastern-Africa	M13	2001	Guerra-Assun?╩o et al., 2015
SAMEA2660982	Other	ERR736808	Eastern-Africa	M13	NA	Guerra-Assun?╩o et al., 2015
SAMEA1530733	Asian-African3	ERR176794	Eastern-Africa	M6	1999	Guerra-Assun?╩o et al., 2015
SAMEA1530615	Asian-African3	ERR176759	Eastern-Africa	M6	1998	Guerra-Assun?╩o et al., 2015
SAMEA1688669	Other	ERR221630	Eastern-Africa	M13	NA	Guerra-Assun?╩o et al., 2015
SAMEA2040760	Other	ERR323119	Eastern-Africa	M13	NA	Guerra-Assun?╩o et al., 2015
SAMEA1569183	Asian-African3	ERR212013	Eastern-Africa	M6	1999	Guerra-Assun?╩o et al., 2015
SAMEA1556692	Asian-African3	ERR181722	Eastern-Africa	M6	2005	Guerra-Assun?╩o et al., 2015
SAMEA1569189	Other	ERR212081	Eastern-Africa	M3	1999	Guerra-Assun?╩o et al., 2015
SAMEA1556748	Asian-African2	ERR181828	Eastern-Africa	M10	NA	Guerra-Assun?╩o et al., 2015
SAMEA1688656	Asian-African3	ERR216956	Eastern-Africa	M6	NA	Guerra-Assun?╩o et al., 2015
SAMEA1569316	Asian-African3	ERR212037	Eastern-Africa	M6	1998	Guerra-Assun?╩o et al., 2015
SAMEA1556736	Asia-Ancestral3	ERR181696	Eastern-Africa	M2	2006	Guerra-Assun?╩o et al., 2015
SAMEA1569125	Asian-African3	ERR190363	Eastern-Africa	M6	NA	Guerra-Assun?╩o et al., 2015
SAMEA1569273	Other	ERR190401	Eastern-Africa	M13	2002	Guerra-Assun?╩o et al., 2015
SAMEA1688483	Asia-Ancestral3	ERR221573	Eastern-Africa	M2	2003	Guerra-Assun?╩o et al., 2015
SAMEA1530914	Asian-African3	ERR176718	Eastern-Africa	M6	2000	Guerra-Assun?╩o et al., 2015
SAMEA1688577	Asian-African3	ERR216966	Eastern-Africa	M6	2010	Guerra-Assun?╩o et al., 2015
SAMEA1569301	Other	ERR190368	Eastern-Africa	M13	2001	Guerra-Assun?╩o et al., 2015
SAMEA1688521	Asian-African3	ERR221584	Eastern-Africa	M6	2008	Guerra-Assun?╩o et al., 2015
SAMEA1688594	Other	ERR221553	Eastern-Africa	M13	2002	Guerra-Assun?╩o et al., 2015
SAMEA1688651	Other	ERR216958	Eastern-Africa	M13	2010	Guerra-Assun?╩o et al., 2015
SAMEA2267009	Other	ERR473304	Eastern-Africa	M13	NA	Guerra-Assun?╩o et al., 2015
SAMEA2660979	Asian-African3	ERR736805	Eastern-Africa	M6	NA	Guerra-Assun?╩o et al., 2015
SAMEA1569348	Other	ERR190378	Eastern-Africa	M3	1999	Guerra-Assun?╩o et al., 2015
SAMEA1688666	Other	ERR221628	Eastern-Africa	M13	NA	Guerra-Assun?╩o et al., 2015
SAMEA1569205	Other	ERR212126	Eastern-Africa	M13	2001	Guerra-Assun?╩o et al., 2015
SAMEA1688590	Other	ERR216962	Eastern-Africa	M3	2010	Guerra-Assun?╩o et al., 2015
SAMEA1688482	Other	ERR221572	Eastern-Africa	M3	2003	Guerra-Assun?╩o et al., 2015
SAMEA1569224	Asian-African3	ERR212104	Eastern-Africa	M6	1998	Guerra-Assun?╩o et al., 2015
SAMEA1688665	Other	ERR221629	Eastern-Africa	M13	NA	Guerra-Assun?╩o et al., 2015
SAMEA1569138	Other	ERR190369	Eastern-Africa	M3	2002	Guerra-Assun?╩o et al., 2015
SAMEA2266988	Other	ERR473283	Eastern-Africa	M3	NA	Guerra-Assun?╩o et al., 2015
SAMEA1485502	Other	ERR163990	Eastern-Africa	M13	2004	Guerra-Assun?╩o et al., 2015
SAMEA1688571	Other	ERR221603	Eastern-Africa	M13	NA	Guerra-Assun?╩o et al., 2015
SAMEA1688632	Other	ERR221542	Eastern-Africa	M13	2002	Guerra-Assun?╩o et al., 2015
SAMEA2267031	Asia-Ancestral3	ERR473326	Eastern-Africa	M2	NA	Guerra-Assun?╩o et al., 2015
SAMEA1556779	Other	ERR181866	Eastern-Africa	M3	1998	Guerra-Assun?╩o et al., 2015
SAMEA1556505	Asian-African3	ERR181891	Eastern-Africa	M6	2001	Guerra-Assun?╩o et al., 2015
SAMEA1556792	Asian-African3	ERR181960	Eastern-Africa	M6	2004	Guerra-Assun?╩o et al., 2015
SAMEA1530692	Other	ERR176799	Eastern-Africa	M3	1999	Guerra-Assun?╩o et al., 2015
SAMEA1688695	Asian-African3	ERR221524	Eastern-Africa	M6	2000	Guerra-Assun?╩o et al., 2015
SAMEA1556632	Other	ERR181821	Eastern-Africa	M13	2008	Guerra-Assun?╩o et al., 2015
SAMEA1556680	Other	ERR181898	Eastern-Africa	M3	2001	Guerra-Assun?╩o et al., 2015
SAMEA1465971	Other	ERR126606	Eastern-Africa	M3	2007	Guerra-Assun?╩o et al., 2015
SAMEA1688636	Other	ERR221605	Eastern-Africa	M13	2003	Guerra-Assun?╩o et al., 2015
SAMN02350408	Other	SRR1011449;SRR106281	Southern-Africa	M12	NA	TB-ARC-KRITH
SAMN02350409	Asian-African2	SRR1011450	Southern-Africa	M11	NA	TB-ARC-KRITH
SAMN02350410	Asian-African2	SRR1011451	Southern-Africa	M11	NA	TB-ARC-KRITH
SAMN02350432	Other	SRR1011473	Southern-Africa	M12	NA	TB-ARC-KRITH
SAMN02350436	Other	SRR1011478	Southern-Africa	M12	NA	TB-ARC-KRITH
SAMN02350439	Other	SRR1011482	Southern-Africa	M12	NA	TB-ARC-KRITH
SAMN02350446	Asian-African2	SRR1011488	Southern-Africa	M9	NA	TB-ARC-KRITH
SAMN02350447	Pacific-RD150	SRR1011489	Southern-Africa	M8	NA	TB-ARC-KRITH
SAMN02350449	Asian-African2	SRR1011491	Southern-Africa	M9	NA	TB-ARC-KRITH
SAMN02350452	Other	SRR1019126	Southern-Africa	M12	NA	TB-ARC-KRITH
SAMN02350455	Asian-African1	SRR1019129	Southern-Africa	M4	NA	TB-ARC-KRITH
SAMN02350457	Asian-African2	SRR1019131	Southern-Africa	M9	NA	TB-ARC-KRITH
SAMN02350458	Other	SRR1019132	Southern-Africa	M13	NA	TB-ARC-KRITH
SAMN02350459	Asian-African2	SRR1019133	Southern-Africa	M9	NA	TB-ARC-KRITH
SAMN02350462	Other	SRR1019136	Southern-Africa	M13	NA	TB-ARC-KRITH
SAMN02350465	Asian-African2	SRR1019140	Southern-Africa	M9	NA	TB-ARC-KRITH
SAMN02350466	Asian-African2	SRR1019144	Southern-Africa	M9	NA	TB-ARC-KRITH
SAMN02350468	Asian-African1	SRR1019146	Southern-Africa	M4	NA	TB-ARC-KRITH
SAMN02350469	Asian-African2	SRR1019147	Southern-Africa	M9	NA	TB-ARC-KRITH
SAMN02350470	Asia-Ancestral1(RD181+)	SRR1019148	Southern-Africa	M1	NA	TB-ARC-KRITH
SAMN02350473	Asia-Ancestral1(RD181+)	SRR1019152	Southern-Africa	M1	NA	TB-ARC-KRITH
SAMN02350496	Asian-African2	SRR1019157	Southern-Africa	M9	NA	TB-ARC-KRITH
SAMN02585991	Asian-African2	SRR1172789	Southern-Africa	M9	NA	TB-ARC-KRITH
SAMN02586028	Other	SRR1172809	Southern-Africa	M13	NA	TB-ARC-KRITH
SAMN02586086	Asia-Ancestral1(RD181+)	SRR1172814	Southern-Africa	M1	NA	TB-ARC-KRITH
SAMN02586035	Asian-African2	SRR1172818	Southern-Africa	M9	NA	TB-ARC-KRITH
SAMN02586031	Asia-Ancestral1(RD181+)	SRR1172830	Southern-Africa	M1	NA	TB-ARC-KRITH
SAMN02586089	Asian-African1	SRR1172841	Southern-Africa	M4	NA	TB-ARC-KRITH
SAMN02586043	Asian-African2	SRR1172845	Southern-Africa	M9	NA	TB-ARC-KRITH
SAMN02586056	Asian-African2	SRR1172850	Southern-Africa	M9	NA	TB-ARC-KRITH
SAMN02586047	Asian-African2	SRR1172952	Southern-Africa	M9	NA	TB-ARC-KRITH
SAMN02585885	Asian-African2	SRR1172961	Southern-Africa	M9	NA	TB-ARC-KRITH
SAMN02586096	Asia-Ancestral3	SRR1172974	Southern-Africa	NA	NA	TB-ARC-KRITH
SAMN02586067	Asia-Ancestral1(RD181+)	SRR1173056	Southern-Africa	M1	NA	TB-ARC-KRITH
SAMN02585999	Asian-African2	SRR1173070	Southern-Africa	M9	NA	TB-ARC-KRITH
SAMN02586008	Asian-African2	SRR1173124	Southern-Africa	M9	NA	TB-ARC-KRITH
SAMN02586103	Other	SRR1173130	Southern-Africa	M3	NA	TB-ARC-KRITH
SAMN02586044	Asian-African2	SRR1173158	Southern-Africa	M9	NA	TB-ARC-KRITH
SAMN02586072	Asia-Ancestral1(RD181+)	SRR1173184	Southern-Africa	M1	NA	TB-ARC-KRITH
SAMN02586012	Asian-African2	SRR1173219	Southern-Africa	M9	NA	TB-ARC-KRITH
SAMN02586062	Asian-African2	SRR1173223	Southern-Africa	M10	NA	TB-ARC-KRITH
SAMN02586026	Asian-African2	SRR1173389	Southern-Africa	M9	NA	TB-ARC-KRITH
SAMN02586088	Asian-African1	SRR1173394	Southern-Africa	M4	NA	TB-ARC-KRITH
SAMN02585952	Asian-African2	SRR1180137	Southern-Africa	M9	NA	TB-ARC-KRITH
SAMN02585911	Pacific-RD150	SRR1180147	Southern-Africa	M8	NA	TB-ARC-KRITH
SAMN02585907	Asian-African2	SRR1180168	Southern-Africa	M9	NA	TB-ARC-KRITH
SAMN02585958	Asian-African1	SRR1180173	Southern-Africa	M4	NA	TB-ARC-KRITH
SAMN02585895	Asian-African2	SRR1180227	Southern-Africa	M9	NA	TB-ARC-KRITH
SAMN02585943	Asian-African2	SRR1180238	Southern-Africa	M10	NA	TB-ARC-KRITH
SAMN02585938	Other	SRR1180244	Southern-Africa	NA	NA	TB-ARC-KRITH
SAMN02585951	Asian-African2	SRR1180245	Southern-Africa	M9	NA	TB-ARC-KRITH
SAMN02585909	Other	SRR1180253	Southern-Africa	M7	NA	TB-ARC-KRITH
SAMN02585896	Pacific-RD150	SRR1180257	Southern-Africa	M8	NA	TB-ARC-KRITH
SAMN02585980	Asian-African2	SRR1180259	Southern-Africa	M11	NA	TB-ARC-KRITH
SAMN02585953	Other	SRR1180268	Southern-Africa	M7	NA	TB-ARC-KRITH
SAMN02585910	Asian-African2	SRR1180270	Southern-Africa	M11	NA	TB-ARC-KRITH
SAMN02585929	Asian-African2	SRR1180272	Southern-Africa	M9	NA	TB-ARC-KRITH
SAMN02585956	Other	SRR1180273	Southern-Africa	M13	NA	TB-ARC-KRITH
SAMN02585899	Other	SRR1180278	Southern-Africa	M7	NA	TB-ARC-KRITH
SAMN02585941	Asian-African2	SRR1180280	Southern-Africa	M9	NA	TB-ARC-KRITH
SAMN02585912	Asian-African2	SRR1180283	Southern-Africa	M9	NA	TB-ARC-KRITH
SAMN02585947	Other	SRR1180286	Southern-Africa	NA	NA	TB-ARC-KRITH
SAMN02585979	Asian-African2	SRR1180315	Southern-Africa	M9	NA	TB-ARC-KRITH
SAMN02586083	Asian-African2	SRR1180316	Southern-Africa	M10	NA	TB-ARC-KRITH
SAMN02585901	Asian-African2	SRR1180318	Southern-Africa	M10	NA	TB-ARC-KRITH
SAMN02585891	Asian-African2	SRR1180324	Southern-Africa	M9	NA	TB-ARC-KRITH
SAMN02585940	Asian-African2	SRR1180327	Southern-Africa	M9	NA	TB-ARC-KRITH
SAMN02585948	Asian-African2	SRR1180333	Southern-Africa	M9	NA	TB-ARC-KRITH
SAMN02585922	Asian-African2	SRR1180343	Southern-Africa	M9	NA	TB-ARC-KRITH
SAMN02585916	Other	SRR1180398	Southern-Africa	M7	NA	TB-ARC-KRITH
SAMN02053779	Asian-African2	SRR832982	Southern-Africa	M9	NA	TB-ARC-KRITH
SAMN02053780	Other	SRR832984	Southern-Africa	M13	NA	TB-ARC-KRITH
SAMN02053742	Asian-African2	SRR832985	Southern-Africa	M9	NA	TB-ARC-KRITH
SAMN02053743	Asian-African2	SRR832999	Southern-Africa	M9	NA	TB-ARC-KRITH
SAMN02053776	Asian-African2	SRR833001	Southern-Africa	M9	NA	TB-ARC-KRITH
SAMN02053810	Asian-African2	SRR833003	Southern-Africa	M9	NA	TB-ARC-KRITH
SAMN02053745	Other	SRR833007	Southern-Africa	M3	NA	TB-ARC-KRITH
SAMN02053761	Asian-African2	SRR833009	Southern-Africa	M11	NA	TB-ARC-KRITH
SAMN02053788	Other	SRR833010	Southern-Africa	M3	NA	TB-ARC-KRITH
SAMN02053789	Other	SRR833021	Southern-Africa	M3	NA	TB-ARC-KRITH
SAMN02053795	Asia-Ancestral1(RD181+)	SRR833027	Southern-Africa	M1	NA	TB-ARC-KRITH
SAMN02053800	Asian-African2	SRR833043	Southern-Africa	M9	NA	TB-ARC-KRITH
SAMN02053809	Asian-African2	SRR833057	Southern-Africa	M9	NA	TB-ARC-KRITH
SAMN02053752	Asian-African2	SRR833061	Southern-Africa	M11	NA	TB-ARC-KRITH
SAMN02053772	Asian-African2	SRR833085;SRR833147	Southern-Africa	M9	NA	TB-ARC-KRITH
SAMN01925620	Other	SRR833092	Southern-Africa	M3	NA	TB-ARC-KRITH
SAMN02053759	Asian-African2	SRR833112	Southern-Africa	M9	NA	TB-ARC-KRITH
SAMN01925621	Other	SRR833145	Southern-Africa	M3	NA	TB-ARC-KRITH
SAMN02053798	Asian-African2	SRR833159	Southern-Africa	M11	NA	TB-ARC-KRITH
SAMN01925690	Asian-African2	SRR847786	Southern-Africa	M11	NA	TB-ARC-KRITH
SAMN01925665	Asia-Ancestral1(RD181+)	SRR847799	Southern-Africa	M1	NA	TB-ARC-KRITH
SAMN02053812	Asian-African2	SRR924698	Southern-Africa	M9	NA	TB-ARC-KRITH
SAMN02053818	Other	SRR924704	Southern-Africa	M13	NA	TB-ARC-KRITH
SAMN02053822	Pacific-RD150	SRR924708	Southern-Africa	NA	NA	TB-ARC-KRITH
SAMN02053823	Asian-African2	SRR924709	Southern-Africa	M9	NA	TB-ARC-KRITH
SAMN02053824	Asian-African1	SRR924710	Southern-Africa	M4	NA	TB-ARC-KRITH
